# Supplementary material
Source: publisher figshare collection journal article supplement (https://frontiersin.figshare.com/ndownloader/files/31239304)
Supplement: Supplementary file 1 [file 31239304]

## *Supplementary Material*

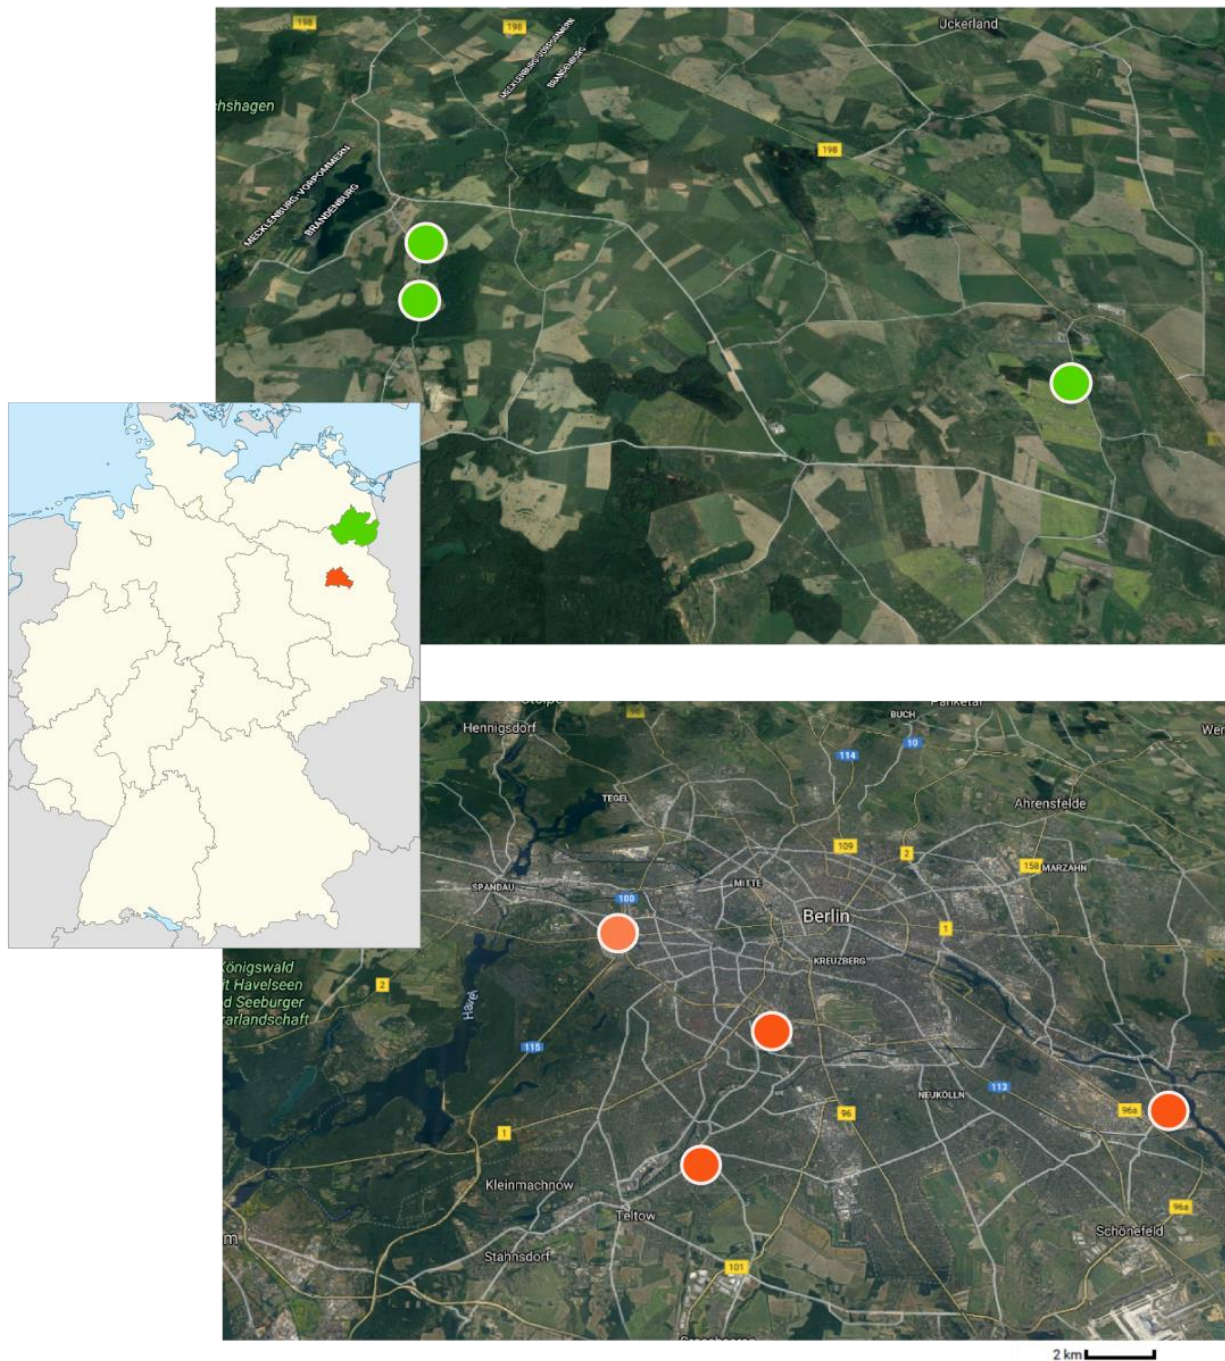

**Supplementary Figure A1.** Location and distances of the rural (green, upper) and urban (orange, lower) trapping sites (adapted from Mazza et al., 2020). Light orange = only common voles.

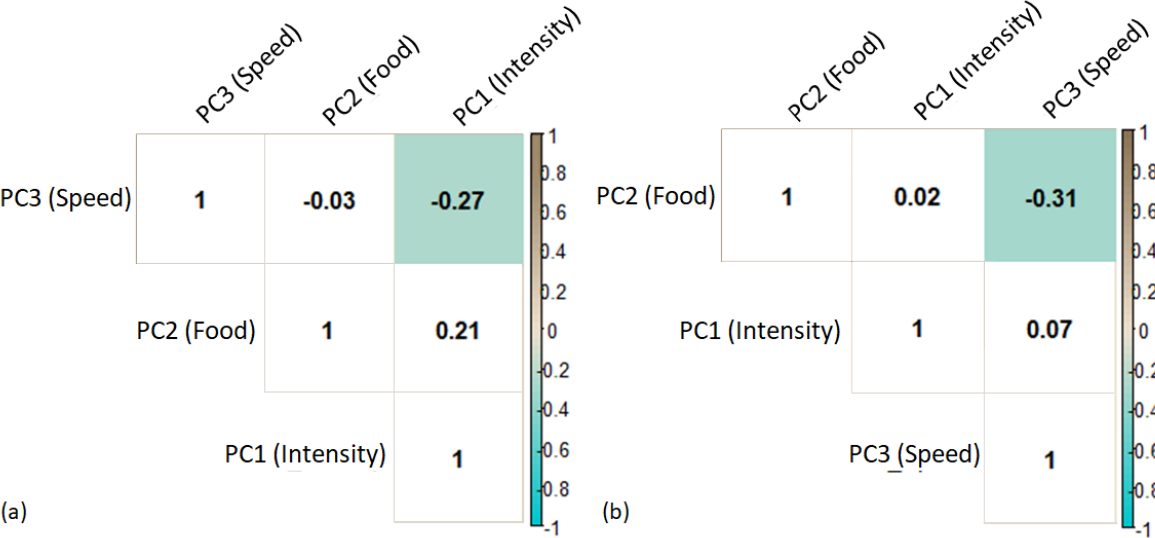

**Supplementary Figure A2.** Phenotypic correlations between composite variables for (a) 47 common voles (*Microtus arvalis*) and (b) 41 striped field mice (*Apodemus agrarius*). Colored background indicates a significant difference from zero.

**Supplementary Table A1.** Adjusted individual repeatabilities of behavioral responses to novelty for 47 common voles (*Microtus arvalis*) and 41 striped field mice (*Apodemus agrarius*) quantified in a battery of three tests (novel object, novel food, novel space). Shown are mean estimates and 95 % credibility intervals of the posterior distribution of the MCMCglmm output.

| Variable     | Common voles          |          |          | Striped field mice    |          |          |
|--------------|-----------------------|----------|----------|-----------------------|----------|----------|
|              | $R_{\text{adjusted}}$ | CI lower | CI upper | $R_{\text{adjusted}}$ | CI lower | CI upper |
| Latency NO   | 0.456                 | 0.284    | 0.638    | 0.354                 | 0.172    | 0.545    |
| Latency NF   | 0.369                 | 0.197    | 0.544    | 0.229                 | 0.084    | 0.405    |
| Latency NS   | 0.425                 | 0.244    | 0.618    | 0.380                 | 0.189    | 0.602    |
| Duration NO  | 0.347                 | 0.150    | 0.534    | 0.324                 | 0.141    | 0.529    |
| Duration NF  | 0.472                 | 0.231    | 0.712    | 0.329                 | 0.119    | 0.548    |
| Duration NS  | 0.566                 | 0.426    | 0.705    | 0.623                 | 0.489    | 0.760    |
| Frequency NO | 0.581                 | 0.430    | 0.711    | 0.610                 | 0.453    | 0.740    |
| Frequency NF | 0.550                 | 0.367    | 0.733    | 0.547                 | 0.365    | 0.710    |
| Frequency NS | 0.589                 | 0.457    | 0.726    | 0.629                 | 0.492    | 0.763    |

**Supplementary Table A2.** Results of model comparisons between our 10 candidate models. Smaller AIC (Akaike Information Criterion) values are given to models that better fit the data. Models whose AIC values differ from that of the top model ( $\Delta\text{AIC}$ ) by more than 2 are considered to lack explanatory power relative to the top model. We also present the values for the Normed Fit Index (NFI) which represents the proportion in the improvement of the overall fit of a given hypothesized model compared to the independence model (Moiron et al., 2019). The Parsimonious Normed Fit Index (PNFI) is a modification of the NFI that takes parsimony of the model into account. (P)NFI values range from 0 (poor improvement) to 1 (perfect improvement). The minimum fit function (FMIN) describes how close the model-implied co-variances (i.e., those calculated based on the model parameter estimates), are to the actual co-variances calculated from the sample. Smaller FMIN values are given to models with the smallest discrepancy.

|                    | Model   | FMIN                   | $\chi^2$ | df | $p$   | NFI          | PNFI         | AIC            |
|--------------------|---------|------------------------|----------|----|-------|--------------|--------------|----------------|
|                    |         |                        |          |    |       |              |              |                |
| Common voles       | Model 0 | 0.314                  | 48.92    | 36 | 0.074 | 0.000        | 0.000        | 2357.49        |
|                    | Model 1 | 0.100                  | 15.62    | 27 | 0.960 | 0.681        | 0.511        | <b>2342.20</b> |
|                    | Model 2 | 0.088                  | 13.75    | 24 | 0.952 | 0.406        | 0.479        | 2346.33        |
|                    | Model 3 | 0.186                  | 29.075   | 25 | 0.261 | 0.406        | 0.282        | 2359.65        |
|                    | Model 4 | 0.093                  | 14.52    | 26 | 0.966 | 0.703        | 0.508        | <b>2343.10</b> |
|                    | Model 5 | 0.093                  | 14.52    | 26 | 0.966 | 0.703        | 0.508        | <b>2343.10</b> |
|                    | Model 6 | Model did not converge |          |    |       |              |              |                |
|                    | Model 7 | Model did not converge |          |    |       |              |              |                |
|                    | Model 8 | <b>0.065</b>           | 10.17    | 24 | 0.994 | 0.751        | 0.521        | <b>2342.78</b> |
| Striped field mice | Model 9 | 0.078                  | 12.20    | 25 | 0.985 | <b>0.792</b> | <b>0.528</b> | <b>2342.75</b> |
|                    | Model 0 | 0.298                  | 47.63    | 36 | 0.093 | 0.000        | 0.000        | 2089.36        |
|                    | Model 1 | 0.124                  | 19.91    | 27 | 0.834 | 0.582        | 0.436        | 2079.64        |
|                    | Model 2 | 0.030                  | 4.78     | 24 | 1.000 | 0.640        | 0.600        | 2070.51        |
|                    | Model 3 | 0.107                  | 17.16    | 25 | 0.876 | 0.640        | 0.444        | 2080.89        |
|                    | Model 4 | 0.030                  | 4.79     | 26 | 1.000 | 0.899        | <b>0.650</b> | <b>2066.52</b> |
|                    | Model 5 | 0.030                  | 4.79     | 25 | 1.000 | 0.899        | 0.625        | 2068.52        |
|                    | Model 6 | <b>0.022</b>           | 3.46     | 24 | 1.000 | <b>0.927</b> | 0.618        | 2069.19        |
|                    | Model 7 | <b>0.022</b>           | 3.46     | 24 | 1.000 | <b>0.927</b> | 0.618        | 2069.19        |
|                    | Model 8 | Model did not converge |          |    |       |              |              |                |
|                    | Model 9 | 0.088                  | 14.09    | 24 | 0.945 | 0.704        | 0.47         | 2079.82        |

**Supplementary Table A3.** Model results composite scores (PC) describing responses to novelty in relation to area of origin (rural vs. urban), and test round for 47 common voles (*Microtus arvalis*) and 41 striped field mice (*Apodemus agrarius*).  $R_m$  reports the marginal  $R^2$  value based on the fixed factors,  $R_c$  the conditional  $R^2$  value including individual identity as a random factor. Reference levels are given in (). For statistically significant effects, p values are highlighted in bold.

|                    | <i>Variable</i>                        | <i>Fixed factors</i> | <i>Estimate</i> | <i>SE</i> | <i>t/Z</i> | <i>P</i>          | $R^2_m$ | $R^2_c$ |
|--------------------|----------------------------------------|----------------------|-----------------|-----------|------------|-------------------|---------|---------|
| Common voles       | <i>PC1</i><br>(Intensity)              | Intercept            | -1.03           | 0.32      | -3.24      | 0.001             |         |         |
|                    |                                        | Origin (Urban)       | -0.03           | 0.23      | -0.13      | 0.896             | 0.13    | 0.31    |
|                    |                                        | Test round           | 0.72            | 0.20      | 3.69       | <b>&lt; 0.001</b> |         |         |
|                    | <i>PC2</i><br>(Speed,<br>i.e. latency) | Intercept            | 1.57            | 0.31      | 5.10       | 0.000             |         |         |
|                    |                                        | Origin (Urban)       | -0.46           | 0.19      | -2.36      | <b>0.018</b>      | 0.28    | 0.28    |
|                    |                                        | Test round           | -0.93           | 0.20      | -4.73      | <b>&lt; 0.001</b> |         |         |
| Striped field mice | <i>PC3</i><br>(Food)                   | Intercept            | -0.25           | 0.30      | -0.86      | 0.391             |         |         |
|                    |                                        | Origin (Urban)       | -0.44           | 0.26      | -1.69      | 0.090             | 0.07    | 0.52    |
|                    |                                        | Test round           | 0.32            | 0.17      | 1.90       | 0.058             |         |         |
|                    | <i>PC1</i><br>(Intensity)              | Intercept            | 0.93            | 0.25      | 3.78       | 0.000             |         |         |
|                    |                                        | Origin (Urban)       | -0.30           | 0.29      | -1.04      | 0.300             | 0.09    | 0.75    |
|                    |                                        | Test round           | -0.55           | 0.12      | -4.75      | <b>&lt; 0.001</b> |         |         |
|                    | <i>PC2</i><br>(Speed,<br>i.e. latency) | Intercept            | 0.83            | 0.31      | 2.65       | 0.008             |         |         |
|                    |                                        | Origin (Urban)       | -0.31           | 0.26      | -1.20      | 0.229             | 0.08    | 0.38    |
|                    |                                        | Test round           | -0.47           | 0.18      | -2.61      | <b>0.009</b>      |         |         |
|                    | <i>PC3</i><br>(Food)                   | Intercept            | -0.42           | 0.36      | -1.18      | 0.240             |         |         |
|                    |                                        | Origin (Urban)       | 0.10            | 0.24      | 0.43       | 0.664             | 0.02    | 0.05    |
|                    |                                        | Test round           | 0.26            | 0.22      | 1.17       | 0.243             |         |         |

**Supplementary Table A4 .** Results from the *anova* comparison of random structure on the model fit.  $R_m$  reports the marginal  $R^2$  value based on the fixed factors,  $R_c$  the conditional  $R^2$  value including individual identity as a random factor. AIC: Akaike information criterion; BIC: Bayesian information criterion.

|                    | <i>Variable</i>                  | <i>Model</i> | $R^2_m$ | $R^2_c$ | <i>Df</i> | <i>AIC</i> | <i>BIC</i> | <i>logLik</i> | <i>deviance</i> | $X^2$ | <i>P</i> |
|--------------------|----------------------------------|--------------|---------|---------|-----------|------------|------------|---------------|-----------------|-------|----------|
| Common voles       | <i>PC3</i> (Food)                | 1 Site/ID    | 0.07    | 0.52    | 5         | 216.62     | 228.41     | -103.310      | 206.620         |       |          |
|                    |                                  | 1 ID         | 0.07    | 0.52    | 6         | 218.62     | 232.76     | -103.310      | 206.620         | 0     | 1        |
|                    | <i>PC1</i> (Intensity)           | 1 Site/ID    | 0.13    | 0.31    | 4         | 216.47     | 225.89     | -104.230      | 208.470         |       |          |
|                    |                                  | 1 ID         | 0.12    | 0.31    | 5         | 218.41     | 230.19     | -104.200      | 208.410         | 0     | 1        |
|                    | <i>PC2</i> (Speed, i.e. latency) | 1 Site/ID    | 0.28    | 0.28    | 5         | 204.22     | 216.00     | -97.111       | 194.220         |       |          |
|                    |                                  | 1 ID         | 0.28    | 0.28    | 6         | 206.19     | 220.33     | -97.097       | 194.190         | 0     | 1        |
| Striped field mice | <i>PC1</i> (Intensity)           | 1 Site/ID    | 0.09    | 0.75    | 5         | 199.04     | 210.95     | -94.520       | 189.040         |       |          |
|                    |                                  | 1 ID         | 0.09    | 0.74    | 6         | 201.90     | 216.19     | -94.948       | 189.900         | 0     | 1        |
|                    | <i>PC2</i> (Speed, i.e. latency) | 1 Site/ID    | 0.08    | 0.38    | 5         | 228.87     | 240.78     | -109.440      | 218.870         |       |          |
|                    |                                  | 1 ID         | 0.09    | 0.38    | 6         | 230.97     | 245.26     | -109.490      | 218.970         | 0     | 1        |
|                    | <i>PC3</i> (Food)                | 1 Site/ID    | 0.02    | 0.05    | 5         | 233.96     | 245.88     | -111.980      | 223.960         |       |          |
|                    |                                  | 1 ID         | 0.02    | 0.03    | 6         | 235.96     | 250.26     | -111.980      | 223.960         | 0     | 1        |

**Supplementary Table A5.** Mean and standard deviation of variables measured for 47 common voles (*Microtus arvalis*) and 41 striped field mice (*Apodemus agrarius*) in a repeated battery of three novelty tests (novel object NO, novel food NF, novel space NS).

|                           | Variable     | All     |         | Rural   |         | Urban   |         |
|---------------------------|--------------|---------|---------|---------|---------|---------|---------|
|                           |              | Mean    | SD      | Mean    | SD      | Mean    | SD      |
| <i>Common voles</i>       | Latency NO   | 783.9   | 2,174.5 | 793.4   | 1,545.5 | 774.5   | 2,681.9 |
|                           | Duration NO  | 250.4   | 395.0   | 229.2   | 420.1   | 271.6   | 372.4   |
|                           | Frequency NO | 16.4    | 14.0    | 16.4    | 12.0    | 16.5    | 16.0    |
|                           | Latency NF   | 783.8   | 2,069.0 | 546.4   | 965.9   | 1,021.2 | 2,761.4 |
|                           | Duration NF  | 95.2    | 258.0   | 150.9   | 355.5   | 39.4    | 46.1    |
|                           | Frequency NF | 7.9     | 5.3     | 9.1     | 6.5     | 6.7     | 3.3     |
|                           | Latency NS   | 1,172.4 | 2,174.0 | 1,213.5 | 1,616.7 | 1,131.3 | 2,638.1 |
|                           | Duration NS  | 1,275.1 | 936.3   | 1,476.5 | 1,064.6 | 1,073.6 | 748.1   |
|                           | Frequency NS | 38.8    | 48.0    | 28.2    | 37.2    | 41.4    | 56.6    |
| <i>Striped field mice</i> | Latency NO   | 60.2    | 284.1   | 41.8    | 191.2   | 90.8    | 395.6   |
|                           | Duration NO  | 887.2   | 785.0   | 1,003.7 | 868.5   | 693.2   | 584.9   |
|                           | Frequency NO | 20.6    | 14.1    | 21.0    | 14.8    | 20.0    | 13.0    |
|                           | Latency NF   | 88.0    | 416.7   | 99.9    | 506.8   | 68.3    | 196.2   |
|                           | Duration NF  | 57.5    | 66.0    | 70.0    | 77.6    | 35.3    | 29.5    |
|                           | Frequency NF | 7.3     | 4.7     | 7.9     | 4.6     | 6.2     | 4.7     |
|                           | Latency NS   | 231.1   | 1,115.8 | 228.4   | 1,182.9 | 235.7   | 1,013.4 |
|                           | Duration NS  | 1,489.8 | 1,011.6 | 1,316.8 | 903.4   | 1,778.3 | 1,127.5 |
|                           | Frequency NS | 16.8    | 15.9    | 18.7    | 18.8    | 13.6    | 8.6     |
